# Supplementary material
Source: Royal Society of Chemistry journal article supplement (doi:10.1039/d6md00226a)
Supplement: d6md00226a2.xlsx [file d6md00226a2.xlsx]

## Sheet: Note
List of abbreviations
Cer	Ceramide
Ch	Cholesterol
ChE	Cholesterol ester
DG	Diacylglucerol
LPC	Lysophosphatidylcholine
LPE	Lysophosphatidylethanolamine
MG	Monoacylglycerol
PC	Phosphatidylcholine
PE	Phosphatidylethanolamine
TG	Triacylglycerol
OA	oleic acid
Calc Mz	Calculated mass
Note
sA-B	A = experiment group; 1 = Control no OA, 2 = Control with OA, 3 = 9y 25 µM, 4 = 9y 50 µM, 5 = 9y 100 µM, 6 = AMPK activator 25 µM, and 7 = Silymarin 50 µg/mL
	B = replication
(X:Y)	X = number of carbon atom(s) in hydrocarbon chain
	Y = number of unsaturated unit(s)/double bond(s) in hydrocarbon chain
d	Sphingolipid contains dihydroxy groups
t	Sphingolipids contains trihydroxy groups

## Sheet: Cer
Molec Group Key	Calc Mz	Area
		s1-1	s1-2	s1-3	s2-1	s2-2	s2-3	s3-1	s3-2	s3-3	s4-1	s4-2	s4-3	s5-1	s5-2	s5-3	s6-1	s6-2	s6-3	s7-1	s7-2	s7-3
Cer(d34:1)	520.509	2.55187e+06	2.08237e+06	2.67364e+06	1.14869e+06	1.88047e+06	2.30046e+06	2.02352e+06	2.53363e+06	2.27961e+06	2.07346e+06	2.78271e+06	2.19428e+06	1.75376e+06	1.76076e+06	1.56277e+06	1.13851e+06	1.89996e+06	1.89447e+06	1.93207e+06	1.90188e+06	1.95061e+06
Cer(d34:2)	536.504	252494	375742	324668	471481	671663	665698	476964	575386	645564	245745	275679	273259	183369	381283	457187	591194	523146	459570	585546	711586	690214
Cer(d36:1)	548.54	752524	2.33056e+06	2.40159e+06	2.27818e+06	2.24378e+06	2.27549e+06	2.47126e+06	1.14925e+06	2.4265e+06	1.48227e+06	970646	2.24566e+06	2.58352e+06	998881	2.16894e+06	2.04493e+06	2.23497e+06	2.44149e+06	2.30638e+06	2.49351e+06	2.55474e+06
Cer(d38:1)	576.571	3.2491e+06	3.37378e+06	3.00734e+06	3.55907e+06	3.7582e+06	3.68325e+06	3.10198e+06	3.31253e+06	3.5222e+06	3.22948e+06	2.64061e+06	3.1999e+06	2.90266e+06	3.13244e+06	3.29194e+06	3.69933e+06	1.90599e+06	1.68489e+06	4.08402e+06	4.01954e+06	3.96205e+06
Cer(d40:1)	604.603	9.74025e+06	1.08981e+07	1.06662e+07	1.19882e+07	1.28477e+07	1.36973e+07	1.01815e+07	1.0609e+07	9.00937e+06	8.32082e+06	8.9143e+06	8.78624e+06	7.96461e+06	8.98167e+06	8.60227e+06	1.24793e+07	1.20863e+07	1.30469e+07	1.44146e+07	1.54491e+07	1.53515e+07
Cer(d40:2)	602.587	3.66927e+06	3.87421e+06	3.03255e+06	4.58549e+06	5.32631e+06	4.36046e+06	3.56697e+06	3.58552e+06	3.54778e+06	3.51258e+06	3.543e+06	3.93549e+06	3.83138e+06	4.02853e+06	4.09685e+06	3.10701e+06	3.53657e+06	3.06617e+06	4.7871e+06	4.6756e+06	4.9781e+06
Cer(d40:3)	618.582	691399	605111	747353	617540	675800	649519	773433	814491	815971	574809	531489	576137	583309	572363	523215	834396	1.22229e+06	840122	1.0707e+06	1.23287e+06	1.16471e+06
Cer(d41:1)	618.618	5.58775e+06	5.97216e+06	5.8703e+06	5.82705e+06	6.37278e+06	6.92943e+06	4.82731e+06	5.23273e+06	5.4237e+06	4.80078e+06	4.51963e+06	4.10614e+06	3.38821e+06	3.698e+06	4.30993e+06	6.47239e+06	6.07089e+06	6.23375e+06	7.97409e+06	7.9633e+06	8.39172e+06
Cer(d41:2)	616.603	2.237e+06	2.4693e+06	2.64617e+06	3.1187e+06	3.24936e+06	3.26732e+06	2.52946e+06	2.65414e+06	2.69815e+06	2.32467e+06	2.30808e+06	2.15193e+06	2.73392e+06	2.59257e+06	2.67079e+06	2.61269e+06	2.34455e+06	2.25432e+06	3.95008e+06	3.91956e+06	3.89038e+06
Cer(d41:4)	630.582	646447	607613	663340	649913	608997	691731	602969	636305	614044	527268	535496	536578	622999	257977	655715	603128	579316	521089	807733	829147	739873
Cer(d42:0)	652.66	7.26486e+06	7.46948e+06	7.68537e+06	9.78499e+06	1.00432e+07	1.05636e+07	9.39965e+06	1.04866e+07	9.87113e+06	6.43843e+06	6.10762e+06	6.40691e+06	5.86228e+06	5.10098e+06	5.87602e+06	1.30879e+07	1.26494e+07	1.23708e+07	1.64279e+07	1.68181e+07	1.59579e+07
Cer(d42:1)	650.645	7.0871e+06	7.07262e+06	7.83511e+06	8.55667e+06	8.96701e+06	8.8197e+06	6.59726e+06	6.72117e+06	7.13647e+06	6.01763e+06	5.50453e+06	6.08444e+06	4.89745e+06	4.7898e+06	5.42692e+06	8.82477e+06	8.37967e+06	9.20154e+06	1.06831e+07	1.09605e+07	1.08009e+07
Cer(d42:2)	648.629	3.73991e+07	3.73677e+07	3.65735e+07	5.05909e+07	5.27198e+07	5.47868e+07	4.05678e+07	4.17425e+07	4.32416e+07	3.74365e+07	3.80247e+07	3.86013e+07	3.76783e+07	4.12575e+07	4.33903e+07	3.89918e+07	3.87452e+07	3.92277e+07	6.64761e+07	5.97559e+07	5.77169e+07
Cer(d42:3)	646.613	7.15153e+06	8.93515e+06	8.34425e+06	1.15723e+07	1.20994e+07	1.26658e+07	1.02674e+07	9.62329e+06	1.03954e+07	9.73144e+06	9.62524e+06	9.6591e+06	1.00168e+07	1.00819e+07	1.03828e+07	9.89141e+06	9.48902e+06	9.5826e+06	1.46589e+07	1.46916e+07	1.42781e+07
Cer(d42:4)	644.598	5.19371e+06	4.83892e+06	4.43851e+06	5.38021e+06	5.56564e+06	6.03763e+06	5.07931e+06	5.4598e+06	2.44641e+06	4.42307e+06	3.76802e+06	4.50084e+06	4.20267e+06	4.68661e+06	4.84123e+06	4.765e+06	5.26466e+06	6.22196e+06	6.76509e+06	6.64716e+06	6.76862e+06
Cer(d43:0)	666.676	1.38365e+06	1.42604e+06	1.53551e+06	595192	573423	527032	813930	770788	787447	663871	635324	544786	320237	327831	347232	534390	452036	465670	482569	519111	519088
Cer(d43:1)	646.65	2.70979e+06	2.89733e+06	2.67516e+06	2.52936e+06	2.78919e+06	2.77774e+06	2.2127e+06	2.25503e+06	2.34799e+06	1.48999e+06	1.77057e+06	1.99427e+06	1.35116e+06	1.22084e+06	1.6156e+06	2.61154e+06	2.53264e+06	2.51952e+06	3.49474e+06	3.64304e+06	2.8943e+06
Cer(d43:2)	662.645	1.23954e+06	1.21115e+06	1.42489e+06	1.41827e+06	1.0528e+06	1.48958e+06	1.32271e+06	1.07339e+06	1.38613e+06	1.16373e+06	1.15502e+06	1.10836e+06	1.13694e+06	1.20555e+06	1.2898e+06	1.20348e+06	1.05595e+06	1.06149e+06	1.74286e+06	1.9965e+06	1.92846e+06
Cer(d44:1)	678.676	1.02832e+06	1.02111e+06	797540	747596	594241	900619	584058	912267	926659	889818	637686	589457	456362	408249	443855	822237	470081	839780	1.12523e+06	1.14059e+06	1.22721e+06
Cer(d44:2)	658.65	3.27942e+06	3.45105e+06	3.3341e+06	3.46071e+06	3.30447e+06	3.47322e+06	2.65462e+06	2.46142e+06	2.33523e+06	2.2605e+06	2.1117e+06	2.27207e+06	1.55665e+06	1.51351e+06	1.82878e+06	2.67212e+06	2.43892e+06	2.52324e+06	3.64957e+06	3.49168e+06	2.04863e+06
Cer(t40:1)	620.598	704120	694343	566375	946136	656159	974027	627689	680857	787513	709918	565131	562304	479683	519925	672466	481275	623812	662411	742946	827213	885463
Cer(t41:1)	634.613	901095	900818	807023	999321	1.07541e+06	1.04292e+06	792188	920767	826146	698444	742587	717353	787705	779679	936529	806363	746063	1.57776e+06	1.31532e+06	1.21299e+06	1.30148e+06
Cer(t42:1)	648.629	2.45732e+06	3.46175e+06	2.45876e+06	3.08321e+06	3.71499e+06	2.21662e+06	2.46116e+06	2.25318e+06	1.7659e+06	1.43714e+06	893693	1.09851e+06	1.04003e+06	1.43758e+06	1.75396e+06	1.68282e+06	2.87066e+06	1.20371e+06	3.30241e+06	1.74599e+06	1.83475e+06
Cer(t42:2)	646.613	3.05008e+06	3.63486e+06	3.02869e+06	4.65655e+06	4.20295e+06	4.34846e+06	4.49323e+06	4.67655e+06	4.71272e+06	3.67836e+06	3.46625e+06	3.43198e+06	3.7795e+06	3.77061e+06	3.80679e+06	4.51729e+06	4.26728e+06	4.6642e+06	6.18339e+06	6.16954e+06	6.61291e+06

## Sheet: Ch
Molec Group Key	Calc Mz	Area
		s1-1	s1-2	s1-3	s2-1	s2-2	s2-3	s3-1	s3-2	s3-3	s4-1	s4-2	s4-3	s5-1	s5-2	s5-3	s6-1	s6-2	s6-3	s7-1	s7-2	s7-3
Ch	369.352	3.1991e+08	2.43333e+08	3.33869e+08	4.02306e+08	3.65009e+08	3.87809e+08	3.95378e+08	3.82368e+08	3.4891e+08	3.15839e+08	3.39739e+08	3.29871e+08	2.41744e+08	2.69609e+08	3.0797e+08	4.27825e+08	2.82104e+08	3.84681e+08	4.39338e+08	3.48324e+08	4.9746e+08

## Sheet: ChE
Molec Group Key	Calc Mz	Area
		s1-1	s1-2	s1-3	s2-1	s2-2	s2-3	s3-1	s3-2	s3-3	s4-1	s4-2	s4-3	s5-1	s5-2	s5-3	s6-1	s6-2	s6-3	s7-1	s7-2	s7-3
ChE(16:0)	642.618	316005	330457	347893	384412	396544	294827	185514	490955	394510	478300	350512	159261	341218	298531	309257	182378	389304	449699	624797	583293	377930
ChE(16:1)	640.603	1.19038e+06	1.40021e+06	1.70135e+06	1.09819e+06	1.75185e+06	1.53625e+06	1.53974e+06	1.2782e+06	1.138e+06	1.47819e+06	1.23374e+06	1.05427e+06	991723	999316	904971	452692	961295	1.18567e+06	988585	1.54395e+06	1.39947e+06
ChE(18:1)	668.634	8.84728e+06	6.34405e+06	6.23732e+06	8.18013e+06	6.28379e+06	1.00926e+07	9.18794e+06	9.77285e+06	8.03716e+06	8.81129e+06	8.5671e+06	8.82269e+06	7.38916e+06	7.37572e+06	6.4045e+06	4.51011e+06	5.30897e+06	6.23404e+06	1.10331e+07	8.97219e+06	8.55356e+06
ChE(18:2)	666.618	1.96297e+06	1.94907e+06	3.22891e+06	2.83525e+06	2.93714e+06	2.037e+06	1.66864e+06	2.83131e+06	2.04349e+06	3.19657e+06	2.21372e+06	2.34848e+06	2.39206e+06	1.97254e+06	1.97002e+06	1.60943e+06	927473	2.27033e+06	2.66643e+06	2.45407e+06	2.43496e+06
ChE(18:4)	645.561	3.44185e+06	2.18936e+06	2.64844e+06	2.6527e+06	2.6172e+06	2.94849e+06	2.61887e+06	2.86025e+06	2.64361e+06	3.47379e+06	2.93442e+06	2.95361e+06	2.8057e+06	2.35527e+06	2.60919e+06	2.56794e+06	2.55656e+06	2.86082e+06	1.55527e+06	2.27505e+06	2.84387e+06
ChE(20:1)	696.665	178094	144024	187016	212702	285122	207621	264934	209758	235592	182628	179890	183581	160342	76543.1	191417	252748	228782	247668	440122	336447	234098
ChE(20:2)	694.65	1.30364e+06	1.22182e+06	1.15641e+06	1.30975e+06	1.31272e+06	1.53487e+06	563046	1.33285e+06	1.27306e+06	1.45874e+06	1.45849e+06	1.29164e+06	1.11006e+06	1.01937e+06	381546	1.04257e+06	977093	1.23767e+06	1.46466e+06	1.40146e+06	1.32217e+06
ChE(20:3)	692.634	318275	251568	285581	283462	295860	268282	269403	288621	227257	293376	277186	232511	238334	216757	224210	225880	224354	243342	307222	316630	263931
ChE(20:4)	673.592	7.05188e+06	8.7092e+06	8.73878e+06	1.20592e+07	1.07607e+07	1.04353e+07	1.1626e+07	1.39713e+07	1.4103e+07	1.58583e+07	1.3753e+07	1.50417e+07	1.37415e+07	1.37712e+07	1.43452e+07	1.35834e+07	1.20823e+07	1.36706e+07	1.39765e+07	1.2422e+07	1.13471e+07
ChE(22:1)	724.697	46459.8	64255.4	68346.6	58788.4	64222	96122.1	58406.6	77889.6	78734.4	57351.3	47009.5	58788.6	34125.3	56275.7	48040.2	99905.1	92532	87793	129093	128240	111194
ChE(22:2)	722.681	73123.9	40457.1	52809.1	62252.2	123491	107123	101744	76509.1	98521.9	97892.3	52234.6	86474.5	63833.1	75285.7	53832.9	75507.8	107561	72556.6	103721	129990	134091
ChE(22:3)	720.665	225177	164778	212727	215050	242545	247189	247106	314323	265169	268674	211769	179433	218182	191105	216953	213702	141026	183867	238633	270742	218926
ChE(22:4)	701.623	129075	86434.3	180479	257061	242820	248225	440602	308908	389256	459998	396216	355787	352035	312775	283291	480287	390436	544692	703304	606679	528499
ChE(24:1)	752.728	64198.6	96082.1	138098	127308	123092	211845	63625.5	107668	159446	64387.8	139753	135319	74180.3	95772.4	110003	279147	286303	253861	170911	339670	283551
ChE(24:3)	748.697	186790	79241	199955	275291	280643	247411	276961	236439	206226	250245	236876	205315	194131	208092	202292	156799	191125	104218	74409.6	111349	290675
ChE(24:4)	746.681	462043	506189	565636	670857	662284	526830	341001	204670	500745	313601	449867	304601	399587	525176	501448	384788	429240	373859	604888	601872	604108
ChE(24:5)	744.665	356044	238166	303039	360759	340247	173794	389279	301976	326919	321294	247111	237262	263809	197497	239864	346154	383315	349468	450759	432818	506483
ChE(24:6)	742.65	277644	248318	290617	250914	242234	262303	209181	148118	250077	168504	200160	152115	138959	199141	229336	316184	292753	270248	323746	439415	267757
ChE(26:1)	780.759	20920.4	48357.7	34328.1	42202.3	51060.5	19634.7	47969.1	49629.4	20817.2	26942.4	36057.8	41601.4	22054.6	10253.6	18852.1	76406.6	82907.7	87141	119015	101715	78693.1
ChE(26:3)	776.728	56687.1	60768.2	68724	67577.6	68878.5	64341.3	72108.7	84220.5	65243.1	85015.3	71257.4	46347.3	48684.1	61130.2	65191	66974.2	51291.2	55350	117747	115012	78815.6
ChE(26:4)	757.686	225566	149433	253437	183065	332752	483337	437597	328502	388015	254668	362691	407463	329144	326324	348893	519514	416330	585002	783586	714244	613172
ChE(26:5)	772.697	357893	363574	506788	525272	380113	334638	407603	305665	302477	270223	345959	305585	358906	222772	414139	650472	458563	439050	215726	518480	589229
ChE(26:6)	753.654	1.29195e+06	1.32825e+06	1.31602e+06	1.20179e+06	1.28515e+06	1.28002e+06	1.08531e+06	1.06824e+06	1.20018e+06	1.11202e+06	1.017e+06	1.12453e+06	844409	847198	888027	1.79713e+06	1.85058e+06	1.927e+06	1.6696e+06	1.58854e+06	1.75079e+06
ChE(26:7)	751.639	81375.6	79905.8	71004.9	125260	108345	136453	104210	142292	126714	88111	124594	150283	127858	126912	169102	92510.9	58171.4	127595	129077	167011	118948
ChE(28:5)	800.728	274026	220173	130537	352636	431552	433442	312336	333050	309412	284117	257039	246985	207987	184927	213372	190687	558275	558829	585411	586326	573655
ChE(28:6)	798.712	788310	655760	868258	889337	1.01242e+06	512187	812955	857310	775681	676898	694347	645120	460338	481785	500943	1.6393e+06	824945	1.53918e+06	1.35956e+06	1.48424e+06	1.34541e+06
ChE(30:6)	826.744	137676	162764	141535	165844	104990	120923	143714	134579	160558	95927.5	105764	108784	77019.8	49906.1	93020.4	260070	271645	296849	303826	263295	243632
ChE(30:7)	824.728	102544	64684	87525.6	112696	109577	82854.1	88603.7	89286.5	100940	79972.2	77465.8	78751.7	43366.6	50201.2	54278.9	224256	194912	233532	163972	151940	135420
ChE(30:8)	822.712	124968	167312	94182.4	107948	129208	122972	91115.7	79577.8	119489	93671.4	83768.2	105997	48820.7	45102.3	72026.6	283199	239082	266529	171677	113139	120492

## Sheet: DG
Molec Group Key	Calc Mz	Area
		s1-1	s1-2	s1-3	s2-1	s2-2	s2-3	s3-1	s3-2	s3-3	s4-1	s4-2	s4-3	s5-1	s5-2	s5-3	s6-1	s6-2	s6-3	s7-1	s7-2	s7-3
DG(30:0)	558.509	352189	283691	376356	483898	370428	452235	273730	270323	222257	223511	250187	256980	135416	199376	145231	387097	366668	384845	303944	321237	285513
DG(32:0)	591.496	6.39337e+06	6.30973e+06	6.20814e+06	4.97372e+06	4.64249e+06	4.36636e+06	5.84829e+06	5.07593e+06	5.3106e+06	5.96516e+06	5.77092e+06	5.72918e+06	5.3344e+06	4.97899e+06	5.15618e+06	6.42696e+06	6.2772e+06	6.4718e+06	3.80349e+06	3.73314e+06	3.83266e+06
DG(32:1)	584.525	4.0992e+06	1.85402e+06	3.71236e+06	5.34806e+06	5.14037e+06	5.18903e+06	1.57013e+06	3.42515e+06	3.63398e+06	3.45829e+06	3.72439e+06	3.66405e+06	2.34359e+06	2.52339e+06	1.70324e+06	5.22368e+06	4.97851e+06	3.10872e+06	4.57609e+06	4.67475e+06	3.86539e+06
DG(34:0)	619.527	5.11777e+06	4.92079e+06	4.2093e+06	5.19737e+06	4.97403e+06	4.88859e+06	5.36771e+06	6.22897e+06	5.95157e+06	4.86568e+06	5.10804e+06	5.47386e+06	4.36693e+06	4.4203e+06	4.88426e+06	7.9761e+06	7.61889e+06	8.15492e+06	4.84842e+06	4.57564e+06	4.46982e+06
DG(34:1)	612.556	1.56594e+07	1.48233e+07	1.50494e+07	2.5215e+07	2.49972e+07	2.52718e+07	1.67518e+07	1.68563e+07	1.64654e+07	1.5302e+07	1.55801e+07	1.65406e+07	1.40296e+07	1.50076e+07	1.46433e+07	2.35183e+07	2.36375e+07	2.43572e+07	2.36243e+07	2.37394e+07	2.5102e+07
DG(34:2)	610.541	2.61443e+07	2.26418e+07	2.48541e+07	3.26898e+07	3.19136e+07	3.0743e+07	2.3124e+07	2.24318e+07	1.96648e+07	1.93425e+07	1.62586e+07	2.2699e+07	1.50349e+07	1.48235e+07	1.57838e+07	2.64734e+07	2.3e+07	2.64685e+07	2.28506e+07	2.42211e+07	2.66984e+07
DG(34:3)	591.498	1.127e+07	1.08662e+07	1.07779e+07	1.0493e+07	1.05561e+07	9.66701e+06	1.00162e+07	9.11658e+06	9.47303e+06	1.00733e+07	9.69989e+06	9.45204e+06	8.00111e+06	7.88534e+06	8.00472e+06	1.04701e+07	9.99122e+06	9.82513e+06	7.67679e+06	7.20279e+06	6.33252e+06
DG(34:4)	589.483	9.89735e+06	1.0383e+07	1.10946e+07	5.56661e+06	5.01757e+06	4.85319e+06	6.92784e+06	6.86437e+06	6.98432e+06	9.28862e+06	9.25472e+06	9.07936e+06	5.71628e+06	5.89975e+06	5.94612e+06	6.16769e+06	6.26954e+06	1.782e+06	3.36708e+06	2.43951e+06	2.89857e+06
DG(35:1)	626.572	377328	260203	535632	301854	598662	477484	347003	482474	318072	498036	258547	280294	278539	61637.2	418976	545361	578712	415912	813314	502512	538423
DG(36:0)	642.603	209093	296663	281453	466361	482938	503683	293043	292537	299712	260249	284668	319486	232818	273271	245669	622212	624874	562091	453550	512983	313906
DG(36:1)	640.587	4.2003e+06	2.29346e+06	3.81994e+06	4.06031e+06	3.30272e+06	4.35191e+06	2.5201e+06	4.36091e+06	2.43865e+06	3.91912e+06	4.09912e+06	3.93336e+06	1.47074e+06	885058	1.65445e+06	6.84998e+06	4.06649e+06	6.83534e+06	7.33415e+06	3.81261e+06	6.66441e+06
DG(36:2)	638.572	1.9645e+07	1.97331e+07	1.8768e+07	3.55291e+07	3.35944e+07	3.31237e+07	2.4145e+07	2.42046e+07	2.4799e+07	2.25663e+07	2.06304e+07	2.16737e+07	1.95213e+07	2.04408e+07	2.00635e+07	2.48199e+07	2.24375e+07	2.3541e+07	2.98001e+07	3.02676e+07	3.11178e+07
DG(36:3)	636.556	1.65845e+07	1.78922e+07	1.69373e+07	2.4793e+07	2.51807e+07	3.50486e+07	1.95246e+07	1.8185e+07	1.92972e+07	1.74545e+07	1.77729e+07	1.64227e+07	1.5183e+07	1.2859e+07	1.24438e+07	1.50284e+07	1.5587e+07	1.63956e+07	2.12363e+07	1.38005e+07	1.80975e+07
DG(36:4)	617.514	3.15142e+07	3.42798e+07	3.26001e+07	3.54432e+07	3.26646e+07	2.95744e+07	3.57928e+07	3.44604e+07	3.62554e+07	3.74482e+07	3.54703e+07	3.6123e+07	3.45986e+07	3.35654e+07	3.52993e+07	3.30466e+07	3.13555e+07	2.99069e+07	2.47823e+07	2.4335e+07	2.47806e+07
DG(37:2)	652.587	386408	373784	413543	652566	667134	652462	431088	472831	491510	414606	350600	324615	404779	390737	367278	411237	428957	457408	717021	634599	689429
DG(38:1)	668.619	366183	629855	617360	1.02224e+06	1.02194e+06	1.14653e+06	567842	653897	683777	551560	554187	566013	433662	477552	221507	1.14778e+06	1.14748e+06	1.12596e+06	1.32594e+06	1.28062e+06	1.22855e+06
DG(38:2)	666.603	2.97755e+06	2.9441e+06	2.85643e+06	5.00945e+06	5.1638e+06	5.84769e+06	3.7931e+06	3.93299e+06	4.04298e+06	3.34012e+06	2.58859e+06	3.36725e+06	2.98215e+06	2.84016e+06	3.31008e+06	4.48349e+06	4.36245e+06	4.32444e+06	6.07159e+06	5.09579e+06	5.45089e+06
DG(38:3)	669.543	6.97283e+06	5.7703e+06	6.79268e+06	1.18197e+07	1.03504e+07	1.18398e+07	9.96137e+06	1.0156e+07	1.00968e+07	1.02474e+07	1.05937e+07	9.70351e+06	1.0325e+07	1.03513e+07	1.03237e+07	7.20045e+06	6.99712e+06	6.06269e+06	2.08599e+06	6.22804e+06	6.04347e+06
DG(38:4)	662.572	1.45745e+07	1.42059e+07	9.9902e+06	1.4704e+07	1.79534e+07	1.41878e+07	1.43586e+07	1.84302e+07	1.3361e+07	1.32635e+07	1.19094e+07	1.16082e+07	1.05098e+07	1.14643e+07	1.63275e+07	1.25038e+07	1.15864e+07	1.36097e+07	1.48819e+07	1.27551e+07	1.52058e+07
DG(38:5)	643.53	3.05062e+07	2.95724e+07	2.96483e+07	3.51101e+07	3.45782e+07	3.17698e+07	3.64283e+07	3.62684e+07	3.48589e+07	3.76973e+07	3.88418e+07	3.70551e+07	3.31967e+07	3.32169e+07	2.98867e+07	2.97333e+07	2.56427e+07	2.63063e+07	2.9499e+07	2.5731e+07	2.63156e+07
DG(38:6)	641.514	1.37002e+07	1.43931e+07	1.38192e+07	1.63996e+07	1.55406e+07	1.51055e+07	1.76416e+07	1.30763e+07	1.61705e+07	1.4824e+07	1.39244e+07	1.30546e+07	1.13506e+07	1.21906e+07	1.20435e+07	1.06784e+07	9.33404e+06	1.10873e+07	6.53535e+06	9.32724e+06	7.64138e+06
DG(40:1)	696.65	397998	444202	471170	823925	756632	810152	471879	442567	391967	365240	394945	395566	353740	319341	348597	786427	793519	763779	1.01429e+06	1.0183e+06	1.03143e+06
DG(40:2)	694.634	1.06919e+06	651060	619401	1.84085e+06	1.34348e+06	1.76015e+06	757143	787228	771540	486043	878435	605507	537362	558420	941174	1.02452e+06	1.05815e+06	974130	1.33493e+06	1.34882e+06	2.2677e+06
DG(40:3)	692.619	739746	538204	720924	994244	1.08013e+06	893998	635159	620320	743029	1.00065e+06	583714	610254	488805	817976	521679	633817	702499	794266	803015	1.30143e+06	987013
DG(40:4)	690.603	1.18049e+06	953402	1.11881e+06	1.57849e+06	1.70189e+06	1.64521e+06	1.48077e+06	1.49842e+06	1.73202e+06	1.77654e+06	1.28007e+06	1.01918e+06	1.22121e+06	1.17458e+06	1.19733e+06	1.24886e+06	818017	906930	1.06398e+06	1.1177e+06	1.36632e+06
DG(40:6)	669.545	7.98891e+06	7.68144e+06	5.03342e+06	1.31973e+07	8.69137e+06	1.08731e+07	1.12585e+07	1.19865e+07	1.15982e+07	1.32173e+07	1.34458e+07	1.18069e+07	1.36477e+07	1.18754e+07	1.20631e+07	8.84641e+06	7.56567e+06	7.09051e+06	3.50415e+06	8.31232e+06	7.73466e+06
DG(40:7)	667.53	2.48697e+06	2.72306e+06	2.33728e+06	3.79634e+06	2.52499e+06	3.49549e+06	4.00272e+06	4.02953e+06	3.66717e+06	3.19671e+06	2.98654e+06	2.96623e+06	3.33861e+06	3.48453e+06	3.62445e+06	2.87713e+06	2.63417e+06	2.71011e+06	3.24976e+06	2.6968e+06	2.94865e+06
DG(42:1)	724.681	235418	231916	292701	411676	338957	397489	206536	191752	258314	240679	204809	144364	162345	154711	152564	340575	325877	401404	507999	441381	510632
DG(42:2)	722.666	239030	468875	557786	792928	317510	784167	458297	558996	186509	490690	452918	197139	250592	400290	475664	702546	637150	696539	787897	1.14762e+06	1.23688e+06
DG(42:7)	695.561	762164	500500	555842	966913	1.26389e+06	1.13116e+06	899625	958373	1.07641e+06	1.43317e+06	1.41886e+06	956947	988250	978210	1.0508e+06	393144	440774	443558	623123	574868	583680
DG(44:2)	750.697	373436	455424	437528	337643	692292	723909	455690	516837	426517	127130	379369	349544	347091	321905	435490	539533	505755	531000	1.07751e+06	1.04992e+06	1.01119e+06
DG(O-36:6)	599.503	8.65571e+06	7.51167e+06	7.62982e+06	1.23824e+07	1.09917e+07	1.29267e+07	5.49338e+06	9.0907e+06	6.85253e+06	8.75202e+06	7.10501e+06	1.27081e+07	7.17715e+06	5.3362e+06	6.50613e+06	8.3844e+06	5.11606e+06	6.54242e+06	8.36363e+06	8.49484e+06	9.3639e+06
DG(O-38:6)	627.535	1.20739e+07	1.89722e+07	7.30312e+06	1.85146e+07	1.50556e+07	1.32088e+07	1.26816e+07	1.33213e+07	1.30836e+07	1.17519e+07	2.03357e+07	5.53805e+06	1.40996e+07	1.45084e+07	1.5394e+07	1.01613e+07	9.55828e+06	1.03667e+07	1.15462e+07	1.37305e+07	1.18641e+07
DG(O-40:1)	682.671	716401	731055	693798	228172	218395	227411	359892	327359	362984	213209	293414	264400	121436	104222	116558	114294	158854	157182	73109.7	63090.6	71151.4

## Sheet: LPC
Molec Group Key	Calc Mz	Area
		s1-1	s1-2	s1-3	s2-1	s2-2	s2-3	s3-1	s3-2	s3-3	s4-1	s4-2	s4-3	s5-1	s5-2	s5-3	s6-1	s6-2	s6-3	s7-1	s7-2	s7-3
LPC(16:0)	496.34	385571	2.01517e+07	302259	2.71321e+06	2.64405e+06	4.9004e+06	3.5489e+06	1.31312e+06	5.36992e+06	506372	436381	584833	3.01001e+06	1.37415e+06	1.01432e+06	3.18127e+06	4.7473e+06	4.99462e+06	1.67424e+07	1.66073e+07	1.44544e+07
LPC(16:1)	494.324	39964.2	54816.7	40798.2	48457.4	11384.3	22966.1	64829.9	79883.7	127826	63953	48435.1	63062	73618.2	59071.4	90298.4	118466	24139.8	22493	3.62244e+06	3.97999e+06	774375
LPC(18:1)	522.355	282796	683525	599371	1.51295e+06	1.79236e+06	3.05652e+06	4.36339e+06	3.94234e+06	2.42544e+06	324697	834911	212688	2.55666e+06	3.36018e+06	2.40139e+06	1.54282e+06	1.59508e+06	3.04566e+06	2.34149e+07	2.44685e+07	3.37723e+07
LPC(18:2)	520.34	1.75732e+06	1.5565e+06	1.44388e+06	72358.9	115342	142302	224359	763890	585179	1.8265e+06	1.7368e+06	1.80424e+06	1.42107e+06	1.01296e+06	818570	136294	130247	69037.4	0.0102734	0	1.26671e-06

## Sheet: LPE
Molec Group Key	Calc Mz	Area
		s1-1	s1-2	s1-3	s2-1	s2-2	s2-3	s3-1	s3-2	s3-3	s4-1	s4-2	s4-3	s5-1	s5-2	s5-3	s6-1	s6-2	s6-3	s7-1	s7-2	s7-3
LPE(16:0)	454.293	2.81446e+06	2.89617e+06	308908	5.6056e+06	4.89358e+06	4.20074e+06	5.92328e+06	5.16078e+06	7.27843e+06	2.302e+06	2.55271e+06	2.49843e+06	2.86645e+06	4.02319e+06	3.65811e+06	3.74903e+06	3.22562e+06	4.99852e+06	2.28641e+06	2.94389e+06	2.79001e+06
LPE(16:1)	452.277	715172	786456	714876	213920	142462	351459	1.34228e+06	1.46834e+06	1.52896e+06	747254	755006	825469	722491	628680	637760	277508	226660	142738	136452	224258	271993
LPE(18:0)	482.324	1.89849e+06	2.0455e+06	1.83652e+06	2.86415e+06	3.72768e+06	2.89598e+06	5.73874e+06	5.22892e+06	3.31329e+06	2.20042e+06	1.57936e+06	1.01369e+06	4.10204e+06	2.40085e+06	1.3734e+06	3.52633e+06	3.27976e+06	1.97175e+06	1.61021e+06	1.80686e+06	1.77802e+06
LPE(18:1)	480.308	5.6273e+06	7.73124e+06	5.12107e+06	1.0539e+07	1.1248e+07	1.7832e+07	2.70872e+07	2.60241e+07	2.99579e+07	1.05737e+07	5.93126e+06	1.03611e+07	1.32552e+07	1.5531e+07	2.17951e+07	8.01563e+06	1.08212e+07	7.1948e+06	1.33656e+07	1.51702e+07	1.60453e+07
LPE(18:2)	478.293	306941	314113	283389	16586.6	9856.93	44235.2	577653	857603	761746	710324	364841	473283	462276	581615	358472	64364.9	82325.9	78970	131039	280396	178469
LPE(20:3)	504.308	363603	383099	420979	84834.9	12879.6	88238	701193	519908	495973	820473	823520	796992	525467	480443	614320	230230	94612.7	154999	10023.4	30320.5	254.075
LPE(20:4)	502.293	713044	980457	949389	153733	111376	278321	1.08493e+06	1.45609e+06	865909	1.06473e+06	1.3712e+06	1.09805e+06	1.37965e+06	1.25769e+06	1.32802e+06	179463	344229	311569	642407	658794	711940
LPE(22:6)	526.293	414498	500919	423065	272929	215118	255567	1.11e+06	1.0987e+06	1.22327e+06	401161	394985	437830	764577	384892	533872	144172	150148	160355	835616	1.00972e+06	521648

## Sheet: MG
Molec Group Key	Calc Mz	Area
		s1-1	s1-2	s1-3	s2-1	s2-2	s2-3	s3-1	s3-2	s3-3	s4-1	s4-2	s4-3	s5-1	s5-2	s5-3	s6-1	s6-2	s6-3	s7-1	s7-2	s7-3
MG(13:0)	289.237	385484	687708	670370	1.39623e+06	1.53893e+06	1.48517e+06	1.47927e+06	1.52733e+06	1.60184e+06	248687	389573	419234	1.48306e+06	1.6351e+06	1.74438e+06	1.12998e+06	1.0588e+06	1.24683e+06	1.23379e+06	1.42121e+06	1.3948e+06

## Sheet: PC
Molec Group Key	Calc Mz	Area
		s1-1	s1-2	s1-3	s2-1	s2-2	s2-3	s3-1	s3-2	s3-3	s4-1	s4-2	s4-3	s5-1	s5-2	s5-3	s6-1	s6-2	s6-3	s7-1	s7-2	s7-3
PC(26:0)	650.476	679901	638709	706698	3.36683e+06	3.2033e+06	3.37652e+06	2.12069e+06	2.16213e+06	1.75698e+06	756775	702539	222579	1.43921e+06	1.24119e+06	1.83988e+06	3.59411e+06	3.65105e+06	3.66914e+06	4.0663e+06	230288	3.54185e+06
PC(28:0)	678.507	1.129e+08	5.25101e+07	1.23574e+08	3.98833e+08	4.15188e+08	2.96855e+08	3.32178e+08	3.45547e+08	3.11071e+08	1.9972e+07	1.57834e+08	1.18257e+08	2.89919e+08	2.74451e+08	2.81842e+08	3.91412e+08	3.74096e+08	3.92067e+08	4.70905e+08	4.84394e+08	4.83874e+08
PC(28:1)	676.491	4.70926e+06	5.76623e+06	6.13197e+06	6.4841e+06	7.24115e+06	7.13565e+06	5.10469e+06	5.01272e+06	5.14572e+06	2.87605e+06	6.74068e+06	6.26851e+06	3.0114e+06	3.47354e+06	5.80227e+06	1.59633e+07	8.85226e+06	1.18824e+07	9.08171e+06	7.29588e+06	7.18103e+06
PC(29:1)	712.489	809288	1.28665e+06	1.66493e+06	2.5788e+06	2.35748e+06	2.35732e+06	1.34361e+06	1.71411e+06	1.99956e+06	2.01194e+06	2.00992e+06	1.03975e+06	914277	850507	874126	1.18672e+06	849973	1.07589e+06	1.36615e+06	748301	994452
PC(30:0)	706.538	4.54097e+08	4.49776e+08	4.17228e+08	8.41446e+08	7.58587e+08	7.66965e+08	5.97162e+08	7.74327e+08	7.19313e+08	3.04795e+08	2.14819e+08	3.92562e+08	6.97826e+08	6.93265e+08	7.41766e+08	7.75045e+08	7.27462e+08	7.12493e+08	7.46662e+08	7.29228e+08	7.45845e+08
PC(30:1)	704.522	6.73961e+08	6.29158e+08	7.90112e+08	5.84082e+08	8.19186e+08	6.03312e+08	8.07755e+08	5.13394e+08	5.56606e+08	6.74922e+08	4.94777e+08	5.96757e+08	4.93969e+08	6.71368e+08	7.88807e+08	7.46076e+08	5.45032e+08	7.34612e+08	1.06523e+09	5.82029e+08	7.66248e+08
PC(30:2)	702.507	6.66956e+06	2.55801e+07	1.5419e+07	2.89748e+07	2.65806e+07	2.76823e+07	1.93602e+07	1.82919e+07	1.94754e+07	1.95494e+07	1.51963e+07	1.99166e+07	1.74477e+07	1.66297e+07	1.89774e+07	2.40864e+07	2.44246e+07	2.43196e+07	3.04514e+07	2.46857e+07	3.06304e+07
PC(31:1)	718.538	8.60809e+07	4.20814e+07	4.83052e+07	8.88729e+07	9.72358e+07	8.92218e+07	7.62995e+07	8.07492e+07	7.15903e+07	2.16931e+07	6.39143e+07	2.78628e+07	7.63857e+07	8.74212e+07	7.24797e+07	8.48206e+07	8.49641e+07	8.07246e+07	1.1946e+08	1.19328e+08	1.09109e+08
PC(32:0)	756.551	4.78693e+06	1.62573e+08	1.18199e+08	1.42499e+08	1.61106e+08	1.80466e+08	1.82733e+07	1.38776e+08	1.42167e+08	6.27048e+07	2.63077e+08	8.99405e+07	1.38689e+08	1.19217e+08	1.59709e+08	7.26572e+07	1.38671e+08	1.58289e+08	1.60112e+08	1.81415e+08	1.68012e+08
PC(32:1)	732.554	2.42112e+09	1.25847e+09	2.75987e+09	1.89525e+09	1.6639e+09	1.79955e+09	1.71688e+09	1.4766e+09	1.58412e+09	1.46717e+09	1.21538e+09	1.14943e+09	1.77661e+09	1.51263e+09	7.16429e+08	1.66492e+09	1.70601e+09	1.82161e+09	1.64855e+09	1.68753e+09	1.70889e+09
PC(32:2)	752.52	6.66034e+08	1.52758e+09	1.41249e+09	1.47927e+09	1.04101e+09	1.52968e+09	9.4234e+08	1.31623e+09	9.64882e+08	1.04419e+09	1.4371e+09	1.44321e+09	8.46256e+08	1.15743e+09	9.03279e+08	1.44841e+09	1.48521e+09	1.34154e+09	9.33884e+08	1.39098e+09	1.41609e+09
PC(32:3)	750.504	2.20087e+07	3.88813e+07	2.15631e+07	2.79149e+07	2.14012e+07	3.29964e+07	1.9891e+07	1.59681e+07	2.65424e+07	1.95452e+07	2.57197e+07	1.98885e+07	2.22506e+07	1.59495e+07	1.70871e+07	2.26941e+07	2.38036e+07	2.90666e+07	2.75552e+07	1.95412e+07	2.2214e+07
PC(32:4)	726.507	1.66454e+07	4.29374e+06	1.50043e+07	2.0803e+07	2.24278e+07	2.15062e+07	2.82238e+07	1.66245e+07	2.72522e+07	1.53408e+07	9.62196e+06	1.41306e+07	2.70955e+07	2.42166e+07	2.4114e+07	2.47653e+07	2.31408e+07	1.47826e+07	1.85266e+07	1.64844e+07	1.55804e+07
PC(33:2)	766.536	521499	377903	372123	1.29837e+06	895250	1.1435e+06	2.17599e+06	1.43695e+06	1.26682e+06	467548	601950	242487	221453	1.23857e+06	2.5065e+06	1.85666e+06	2.4825e+06	1.70535e+06	1.26296e+06	1.54167e+06	1.50397e+06
PC(34:1)	760.585	3.58188e+08	5.29694e+08	5.93423e+08	1.7746e+07	1.92182e+07	1.7771e+07	1.67629e+07	1.6973e+07	1.56485e+07	3.14783e+08	7.86251e+08	8.18127e+08	1.06282e+07	1.398e+07	1.28233e+07	1.44868e+07	2.03162e+07	2.20517e+07	1.63795e+07	1.78763e+07	2.3833e+07
PC(34:2)	758.569	5.20515e+07	2.76592e+07	2.58342e+07	4.03863e+07	3.51781e+07	3.67136e+07	4.31857e+07	3.59476e+07	3.62711e+07	2.48022e+07	2.61613e+07	2.98238e+07	3.71114e+07	3.82853e+07	1.1108e+07	4.31865e+07	5.44889e+07	3.74172e+07	8.15043e+07	1.07739e+07	4.621e+07
PC(34:3)	778.536	3.42533e+08	4.81807e+08	3.83306e+08	3.94558e+08	6.03336e+08	2.85071e+08	2.58496e+08	2.51279e+08	2.43303e+08	3.35052e+08	5.22478e+08	2.34234e+08	2.98951e+08	3.71234e+08	3.4141e+08	3.00121e+08	5.6054e+08	3.85014e+08	4.9117e+08	5.57566e+08	6.35082e+08
PC(34:4)	754.538	1.78254e+07	2.08765e+07	3.1886e+07	2.03876e+07	1.84079e+07	2.09678e+07	3.01397e+07	2.54307e+07	1.57259e+07	2.84123e+07	2.75257e+07	3.07143e+07	1.46202e+07	1.95665e+07	3.26825e+07	2.45836e+07	2.02803e+07	2.06703e+07	2.88648e+07	2.53843e+07	2.3738e+07
PC(34:5)	752.522	2.22953e+07	8.12217e+06	9.80892e+06	9.06559e+06	9.15848e+06	4.2284e+06	1.76577e+07	1.32865e+07	1.06697e+07	8.7911e+06	1.01477e+07	1.51063e+07	5.99005e+06	1.65404e+07	1.1481e+07	1.33023e+07	9.74147e+06	8.32733e+06	8.1414e+06	3.79311e+06	9.21649e+06
PC(36:1)	788.616	7.33877e+08	5.17911e+08	6.77455e+08	6.36592e+08	7.57455e+08	7.95165e+08	7.27716e+08	7.64471e+08	7.80102e+08	7.61218e+08	6.97309e+08	7.53045e+08	7.08061e+08	4.67073e+08	6.86962e+08	8.33186e+08	7.60397e+08	8.06409e+08	4.7596e+08	5.80588e+08	8.76882e+08
PC(36:2)	808.583	2.22629e+07	2.06384e+07	2.05348e+07	3.4161e+07	2.89221e+07	2.77134e+07	2.51147e+07	3.11287e+07	3.1323e+07	1.15729e+07	1.79512e+07	1.89919e+07	3.45277e+07	2.95659e+07	3.38124e+07	2.97241e+07	2.59785e+07	2.75382e+07	5.24555e+07	2.75203e+07	3.45736e+07
PC(36:3)	784.585	3.99563e+08	6.29398e+08	4.27014e+08	4.82821e+08	5.28066e+08	7.07623e+08	5.36562e+08	4.48987e+08	4.27734e+08	7.64045e+08	4.73577e+08	7.27469e+08	6.70533e+08	4.38496e+08	6.09699e+08	5.90854e+08	5.3598e+08	5.49917e+08	6.34107e+08	5.94437e+08	6.4465e+08
PC(36:4)	782.569	2.72976e+06	4.03546e+06	4.74347e+06	813592	3.03135e+06	2.42405e+06	2.34011e+06	777563	1.61162e+06	2.99222e+06	3.34954e+06	7.42017e+06	1.21147e+07	1.48493e+06	3.09331e+06	749223	693769	1.91495e+06	1.35551e+06	2.21823e+06	2.14286e+06
PC(36:5)	780.554	9.40142e+07	8.04143e+07	5.63125e+07	9.08195e+07	1.03998e+08	1.10465e+08	8.71269e+07	9.78318e+07	9.47684e+07	7.07653e+07	9.2597e+07	6.59189e+07	1.14916e+08	9.47221e+07	9.35793e+07	8.43021e+07	9.91216e+07	1.10291e+08	1.12165e+08	1.09311e+08	1.27848e+08
PC(36:6)	778.538	7.99114e+06	6.17543e+06	3.87539e+06	1.01783e+07	9.96981e+06	9.84196e+06	8.06092e+06	8.49949e+06	8.19357e+06	8.08118e+06	4.07476e+06	5.89176e+06	1.04228e+07	1.00182e+07	1.00118e+07	1.0042e+07	8.80755e+06	9.05095e+06	1.16759e+07	1.34056e+07	1.26497e+07
PC(37:2)	800.616	4.73816e+07	4.56636e+07	4.58267e+07	6.28697e+07	6.39754e+07	6.31797e+07	5.58149e+07	5.66995e+07	5.7622e+07	4.69892e+07	4.7882e+07	4.84378e+07	6.2775e+07	6.35614e+07	6.41217e+07	6.17852e+07	5.98539e+07	6.06895e+07	9.58743e+07	9.36788e+07	9.92035e+07
PC(38:1)	816.648	1.87683e+07	1.25096e+07	7.13393e+06	9.87935e+06	1.99078e+07	2.22146e+07	1.4792e+07	2.19622e+07	9.57208e+06	1.54977e+07	6.93734e+06	1.92547e+07	1.70393e+07	1.72554e+07	1.75742e+07	2.60351e+07	1.92532e+07	1.44172e+07	3.04267e+07	2.93494e+07	1.4426e+07
PC(38:2)	814.632	5.13372e+08	4.20763e+08	4.58386e+08	5.53463e+08	4.17432e+08	4.79254e+08	4.38229e+08	5.24593e+08	4.21082e+08	5.26077e+08	4.25225e+08	3.95052e+08	4.98935e+08	4.64089e+08	3.83519e+08	5.30919e+08	5.35116e+08	5.47474e+08	5.47468e+08	7.20436e+08	7.10164e+08
PC(38:3)	812.616	2.23143e+08	2.96609e+08	1.7284e+08	2.40394e+08	3.91298e+08	2.43286e+08	2.52635e+08	2.36062e+08	2.27001e+08	2.71652e+08	1.80709e+08	1.86443e+08	2.53563e+08	2.55894e+08	3.1849e+08	2.41127e+08	2.17105e+08	2.79347e+08	2.5424e+08	2.59601e+08	2.57551e+08
PC(38:4)	810.601	1.64052e+08	1.60539e+08	1.53697e+08	2.24399e+08	1.66534e+08	2.03693e+08	2.12947e+08	2.00705e+08	2.13319e+08	1.78903e+08	1.91916e+08	1.4607e+08	1.98862e+08	2.01302e+08	1.82435e+08	2.1479e+08	2.1967e+08	2.12881e+08	2.50976e+08	2.53401e+08	2.50087e+08
PC(38:6)	806.569	1.64576e+07	3.34878e+07	9.02401e+06	3.77769e+07	4.00547e+07	4.34256e+07	3.86489e+07	4.40276e+07	3.85565e+07	3.9142e+07	3.65928e+07	1.67342e+06	3.65131e+07	4.53499e+07	4.44626e+07	4.96669e+07	5.00167e+07	5.17025e+07	6.62756e+07	6.38569e+07	5.91296e+07
PC(38:7)	804.554	6.42965e+06	1.63311e+06	1.97824e+06	9.64062e+06	9.54055e+06	9.21631e+06	8.28266e+06	1.12413e+07	9.4214e+06	4.53588e+06	3.91458e+06	3.17468e+06	1.38821e+07	1.38121e+07	1.4245e+07	9.91544e+06	9.56208e+06	7.91898e+06	1.33063e+07	1.0598e+07	1.37626e+07
PC(40:1)	844.679	5.82546e+06	3.92599e+06	5.85471e+06	7.81804e+06	7.22532e+06	8.18928e+06	6.2948e+06	6.61203e+06	6.68747e+06	5.56595e+06	5.47527e+06	5.39156e+06	2.03313e+06	4.00834e+06	4.21866e+06	9.56908e+06	1.02654e+07	1.13248e+07	1.19541e+07	1.20391e+07	1.19406e+07
PC(40:2)	842.663	1.54523e+07	3.64548e+06	1.45012e+07	1.72547e+07	1.75998e+07	8.40536e+06	1.59835e+07	1.0707e+07	1.60003e+07	1.43182e+07	1.42366e+07	1.54645e+07	1.2364e+07	1.19435e+07	1.25707e+07	1.90909e+07	1.997e+07	1.89741e+07	2.61081e+07	2.70016e+07	1.62376e+07
PC(40:3)	840.648	4.28404e+07	4.14638e+07	4.24615e+07	2.74162e+07	2.96267e+07	2.9857e+07	2.18501e+07	2.73213e+07	4.28135e+07	4.20241e+07	4.26525e+07	1.95208e+07	4.42727e+07	4.13931e+07	3.94347e+07	4.00285e+07	3.88382e+07	3.28905e+07	6.51938e+07	5.67615e+07	6.13324e+07
PC(40:4)	838.632	1.90965e+07	2.38654e+07	2.13033e+07	2.76544e+07	2.76209e+07	2.71184e+07	2.60153e+07	2.5198e+07	2.61813e+07	2.60998e+07	2.57837e+07	2.61624e+07	2.95776e+07	2.68443e+07	3.79551e+07	2.20653e+07	2.31399e+07	2.21798e+07	3.11478e+07	2.66481e+07	3.08121e+07
PC(42:1)	872.71	5.67995e+06	5.97817e+06	6.18816e+06	7.24092e+06	479366	7.165e+06	2.27332e+06	3.26591e+06	5.25828e+06	1.97858e+06	4.96382e+06	3.26898e+06	2.11455e+06	1.91735e+06	1.40159e+06	9.23033e+06	9.62765e+06	1.03708e+07	8.35884e+06	6.80463e+06	9.90192e+06
PC(42:2)	892.677	1.22119e+07	1.23322e+07	1.3093e+07	1.73933e+07	9.67918e+06	1.75525e+07	1.46261e+07	1.49448e+07	1.52907e+07	1.23326e+07	1.08436e+07	1.21202e+07	8.99375e+06	9.22975e+06	9.04978e+06	1.95997e+07	1.10721e+07	1.281e+07	2.73782e+07	2.87697e+07	2.7092e+07
PC(44:2)	898.726	3.19682e+06	2.49142e+06	3.25429e+06	4.29049e+06	2.5442e+06	4.93402e+06	3.5107e+06	3.5657e+06	3.86736e+06	2.75784e+06	2.9396e+06	2.96901e+06	1.60526e+06	1.5284e+06	1.7787e+06	5.72027e+06	4.58252e+06	5.48272e+06	8.3594e+06	7.9535e+06	5.58205e+06

## Sheet: PE
Molec Group Key	Calc Mz	Area
		s1-1	s1-2	s1-3	s2-1	s2-2	s2-3	s3-1	s3-2	s3-3	s4-1	s4-2	s4-3	s5-1	s5-2	s5-3	s6-1	s6-2	s6-3	s7-1	s7-2	s7-3
PE(28:0)	636.46	325289	147241	302006	591417	499703	499472	405128	383371	409915	181076	142277	150696	265077	254763	274424	325710	295820	461606	616624	470353	373592
PE(30:0)	664.491	1.47742e+06	1.66982e+06	1.50499e+06	1.10541e+06	1.70391e+06	1.87652e+06	1.41699e+06	1.81055e+06	1.50652e+06	1.12792e+06	283797	1.32152e+06	705554	793284	700032	1.48757e+06	1.6239e+06	1.63886e+06	1.28035e+06	1.52184e+06	1.56643e+06
PE(30:1)	662.476	5.46386e+06	6.40895e+06	6.9557e+06	6.24326e+06	6.31904e+06	6.25431e+06	4.50728e+06	4.49428e+06	4.97879e+06	3.15439e+06	4.95484e+06	6.28358e+06	2.78939e+06	2.80739e+06	2.90649e+06	6.11995e+06	5.11004e+06	5.39884e+06	5.43734e+06	4.10732e+06	5.31424e+06
PE(32:0)	692.522	895666	2.52667e+06	1.83113e+06	2.92153e+06	3.04024e+06	2.35034e+06	2.20212e+06	3.44201e+06	3.23297e+06	1.35005e+06	1.39426e+06	1.92573e+06	2.35216e+06	1.09602e+06	1.3289e+06	3.03183e+06	2.32067e+06	4.50618e+06	4.24855e+06	2.18448e+06	3.71701e+06
PE(32:1)	690.507	2.88641e+07	2.71037e+07	3.04984e+07	2.40592e+07	2.32827e+07	2.374e+07	2.08204e+07	2.11379e+07	2.04475e+07	5.10134e+06	1.37312e+07	1.64112e+07	1.29757e+07	1.27119e+07	1.18204e+07	2.16647e+07	2.32586e+07	2.43067e+07	2.02363e+07	2.02825e+07	3.0075e+07
PE(32:2)	688.491	2.35718e+07	3.70757e+07	2.40672e+07	3.59038e+07	4.89812e+07	3.67589e+07	2.71192e+07	2.75026e+07	2.68491e+07	1.47037e+07	3.46738e+07	2.60054e+07	1.53091e+07	1.47852e+07	1.51879e+07	2.21933e+07	2.8765e+07	2.93002e+07	2.81344e+07	2.77147e+07	2.55536e+07
PE(32:3)	686.476	2.39442e+06	1.80952e+06	1.7698e+06	1.77078e+06	1.99373e+06	1.98064e+06	1.59105e+06	1.63297e+06	1.27301e+06	1.45161e+06	1.67241e+06	1.55083e+06	959322	638942	753436	1.6024e+06	1.52156e+06	1.6979e+06	1.35401e+06	1.23098e+06	1.57823e+06
PE(34:0)	720.554	3.7228e+06	3.50113e+06	3.21336e+06	3.6699e+06	3.68223e+06	4.21171e+06	3.58983e+06	3.65842e+06	3.54035e+06	2.9529e+06	3.04806e+06	3.00361e+06	2.8843e+06	2.64524e+06	2.64562e+06	5.13603e+06	4.8061e+06	5.1615e+06	3.99631e+06	4.00687e+06	3.9089e+06
PE(34:1)	718.538	4.24426e+07	4.1106e+07	4.46116e+07	5.01116e+07	5.51206e+07	7.62535e+07	4.57087e+07	4.58792e+07	6.96791e+07	3.64926e+07	3.85868e+07	4.09833e+07	2.41958e+07	3.32371e+07	3.16781e+07	5.10475e+07	4.25959e+07	4.93945e+07	8.2231e+07	4.90403e+07	4.89509e+07
PE(34:2)	716.522	1.00371e+08	2.85341e+08	2.86767e+08	2.14805e+08	2.25674e+08	9.78665e+07	1.90467e+08	1.96142e+08	1.39325e+08	1.01798e+08	2.08964e+08	8.30939e+07	1.39893e+08	1.33045e+08	1.09144e+08	1.86693e+08	1.79939e+08	1.93267e+08	1.1433e+08	1.20386e+08	1.68879e+08
PE(34:3)	714.507	1.15155e+07	1.63583e+07	9.6346e+06	2.01253e+07	1.95971e+07	1.90774e+07	1.54438e+07	1.45456e+07	1.56274e+07	1.23644e+07	1.21416e+07	9.00176e+06	8.47316e+06	7.35568e+06	7.63403e+06	1.72709e+07	1.57751e+07	1.68067e+07	1.31226e+07	1.42421e+07	1.43926e+07
PE(34:4)	712.491	9.57622e+06	6.88697e+06	7.31188e+06	8.55512e+06	9.2265e+06	9.10682e+06	6.47611e+06	6.92198e+06	7.36235e+06	7.06834e+06	6.66795e+06	5.34709e+06	5.57749e+06	4.3068e+06	5.10757e+06	5.91641e+06	5.76752e+06	6.25601e+06	6.57422e+06	6.32674e+06	6.32622e+06
PE(35:3)	728.522	1.53376e+06	1.65986e+06	1.44852e+06	1.96174e+06	1.50847e+06	1.73533e+06	1.60954e+06	1.09484e+06	1.90551e+06	1.32903e+06	1.74897e+06	1.16396e+06	973969	1.05237e+06	1.08948e+06	1.54709e+06	1.62087e+06	1.26886e+06	1.44112e+06	1.67009e+06	1.13857e+06
PE(36:1)	746.569	4.24519e+07	3.98853e+07	3.83017e+07	5.49893e+07	3.0315e+07	5.32268e+07	4.7649e+07	4.80168e+07	4.82959e+07	3.98262e+07	3.94116e+07	3.92586e+07	3.4553e+07	3.30809e+07	3.22746e+07	4.605e+07	4.66159e+07	5.23737e+07	5.6104e+07	5.6164e+07	5.81151e+07
PE(36:2)	744.554	1.33326e+08	1.76907e+08	1.21327e+08	1.75908e+08	2.44871e+08	1.67997e+08	1.99867e+08	1.49036e+08	1.57114e+08	1.61196e+08	2.01231e+08	2.06709e+08	1.14594e+08	1.10637e+08	1.35517e+08	1.69889e+08	1.46639e+08	1.45284e+08	1.9891e+08	1.91063e+08	1.71618e+08
PE(36:3)	742.538	6.65362e+07	6.17664e+07	6.53194e+07	7.34142e+07	8.3419e+07	8.0859e+07	6.53519e+07	6.89538e+07	4.69098e+07	6.5016e+07	6.21622e+07	6.00327e+07	4.2473e+07	3.44593e+07	5.02131e+07	6.82664e+07	6.7842e+07	7.20236e+07	6.06547e+07	7.02155e+07	5.86379e+07
PE(36:4)	740.522	2.89291e+07	4.47145e+07	3.91715e+07	3.29115e+07	3.8659e+07	3.98378e+07	2.68053e+07	2.7761e+07	2.81504e+07	3.82929e+07	2.31241e+07	2.71466e+07	2.53535e+07	2.79788e+07	2.29747e+07	3.27914e+07	3.33706e+07	3.30947e+07	3.08334e+07	2.977e+07	3.00831e+07
PE(36:5)	738.507	5.82273e+06	9.85191e+06	1.04182e+07	1.57301e+07	1.38777e+07	1.46953e+07	1.17811e+07	1.21408e+07	1.12393e+07	6.59727e+06	6.92434e+06	9.05831e+06	9.19457e+06	1.01275e+07	9.19071e+06	1.5237e+07	1.45057e+07	1.50834e+07	1.56557e+07	1.52866e+07	1.44914e+07
PE(36:6)	736.491	5.62589e+06	4.84007e+06	4.777e+06	3.54985e+06	4.26149e+06	4.11604e+06	3.13916e+06	3.5349e+06	3.169e+06	4.5676e+06	4.18782e+06	4.43124e+06	2.68964e+06	2.66657e+06	3.32111e+06	3.70188e+06	3.52228e+06	4.21729e+06	5.00524e+06	4.74485e+06	4.70799e+06
PE(37:3)	756.554	7.00352e+06	5.23049e+06	3.91822e+06	8.41206e+06	8.33332e+06	8.85422e+06	7.39913e+06	6.67078e+06	7.30763e+06	1.83005e+06	3.50786e+06	6.23756e+06	7.20885e+06	6.756e+06	6.4158e+06	5.09372e+06	2.38717e+06	5.52505e+06	6.62771e+06	6.21206e+06	6.53565e+06
PE(37:4)	754.538	8.81194e+06	8.04419e+06	9.82111e+06	7.38114e+06	7.59399e+06	5.493e+06	8.09851e+06	4.32455e+06	7.41007e+06	9.52567e+06	6.21416e+06	5.82949e+06	5.09048e+06	5.20441e+06	5.66646e+06	6.72616e+06	5.75348e+06	5.97723e+06	4.88473e+06	6.04423e+06	5.42971e+06
PE(37:5)	752.522	225098	189317	93692.2	92047.1	106789	141889	152004	95301.8	201984	122277	169217	60740.2	46399.4	98045	200236	98949	226628	166450	104062	114640	85862.8
PE(38:1)	774.601	2.95581e+06	1.09934e+06	774420	2.28676e+06	3.95606e+06	1.9685e+06	3.28901e+06	2.95401e+06	844752	2.45659e+06	1.25944e+06	2.74017e+06	2.19342e+06	2.02943e+06	2.14292e+06	2.51214e+06	3.39795e+06	3.76021e+06	2.87517e+06	3.47086e+06	4.3814e+06
PE(38:2)	772.585	4.11728e+07	2.85795e+07	2.61283e+07	5.35892e+07	5.03641e+07	5.35734e+07	4.96845e+07	4.71228e+07	3.39625e+07	3.10548e+07	2.66329e+07	3.98998e+07	3.30611e+07	3.37212e+07	3.10043e+07	3.6582e+07	3.78452e+07	3.72218e+07	5.82434e+07	4.88529e+07	5.78391e+07
PE(38:3)	770.569	6.20979e+07	7.26154e+07	6.82432e+07	8.98639e+07	8.3376e+07	9.44397e+07	7.22105e+07	7.43848e+07	7.52693e+07	6.71433e+07	6.55823e+07	7.09753e+07	6.97029e+07	6.19079e+07	5.81455e+07	4.64271e+07	4.68493e+07	4.72882e+07	6.49227e+07	6.26934e+07	6.05629e+07
PE(38:4)	768.554	1.02972e+08	6.79991e+07	7.93582e+07	8.18929e+07	8.69855e+07	7.04144e+07	7.15607e+07	7.72012e+07	7.63017e+07	9.25501e+07	8.85168e+07	7.05055e+07	7.64239e+07	8.53016e+07	8.04526e+07	7.23061e+07	7.57475e+07	7.46462e+07	8.16552e+07	8.43541e+07	8.73613e+07
PE(38:5)	766.538	8.03875e+07	1.1063e+08	1.12735e+08	1.30341e+08	1.30011e+08	1.25389e+08	1.22392e+08	1.31331e+08	1.20465e+08	1.20204e+08	1.20151e+08	1.20202e+08	1.24552e+08	1.31143e+08	1.19058e+08	1.21629e+08	1.25374e+08	1.20235e+08	1.25227e+08	1.301e+08	1.31057e+08
PE(38:6)	764.522	1.67695e+07	1.74961e+07	1.89088e+07	1.83296e+07	1.77662e+07	1.73445e+07	1.66833e+07	1.76088e+07	1.61113e+07	1.74823e+07	1.4005e+07	1.61643e+07	1.86876e+07	1.72636e+07	1.86479e+07	1.93576e+07	1.71632e+07	1.90985e+07	2.01123e+07	2.12224e+07	1.94726e+07
PE(38:7)	762.507	1.47001e+07	8.69463e+06	1.2528e+07	1.93042e+07	1.93311e+07	2.01424e+07	1.49147e+07	1.52408e+07	1.56218e+07	4.83813e+06	1.27772e+07	3.75757e+06	1.57349e+07	1.66385e+07	1.54787e+07	1.60033e+07	1.4575e+07	1.60389e+07	1.98714e+07	1.93091e+07	1.90971e+07
PE(39:5)	780.554	2.58913e+06	1.19323e+06	1.29103e+06	915905	947258	854246	717676	875922	911748	1.37676e+06	974866	1.47823e+06	1.18962e+06	906688	747508	922633	1.22648e+06	1.11889e+06	743527	936884	865091
PE(40:1)	802.632	2.30934e+06	3.14811e+06	3.19942e+06	3.37033e+06	3.97683e+06	3.01139e+06	2.35152e+06	1.78092e+06	2.51208e+06	1.58829e+06	1.68825e+06	1.35787e+06	1.14191e+06	966871	1.08383e+06	2.77535e+06	2.19056e+06	2.9277e+06	3.19264e+06	2.70162e+06	3.13977e+06
PE(40:4)	796.585	8.35429e+06	7.99049e+06	8.09181e+06	9.03002e+06	9.99626e+06	1.07494e+07	7.73471e+06	8.30102e+06	8.70225e+06	8.30212e+06	8.485e+06	7.98128e+06	8.13745e+06	8.42531e+06	9.01864e+06	6.51405e+06	5.95579e+06	6.14294e+06	9.02516e+06	8.55233e+06	8.17853e+06
PE(40:5)	794.569	1.31081e+07	1.28897e+07	1.30441e+07	1.35102e+07	1.50445e+07	1.50517e+07	1.30797e+07	1.2213e+07	1.29164e+07	9.46232e+06	1.07431e+07	1.1768e+07	1.46277e+07	1.48287e+07	1.46201e+07	1.17879e+07	1.17501e+07	1.15974e+07	1.49593e+07	1.45332e+07	1.48234e+07
PE(40:6)	792.554	1.61676e+07	1.59536e+07	1.50644e+07	1.91211e+07	1.95278e+07	2.45396e+07	1.88393e+07	1.65161e+07	1.8018e+07	1.43363e+07	1.4022e+07	1.82131e+07	2.14704e+07	1.90108e+07	1.83367e+07	1.59159e+07	1.58734e+07	1.64557e+07	1.89557e+07	1.9217e+07	2.47409e+07
PE(40:7)	790.538	2.75482e+07	2.33248e+07	4.43153e+07	2.62614e+07	2.81788e+07	2.76673e+07	2.71071e+07	2.58222e+07	2.5524e+07	2.63961e+07	5.60137e+07	4.0058e+07	3.0645e+07	2.96632e+07	3.0344e+07	2.10773e+07	2.0575e+07	2.25478e+07	3.03754e+07	2.81585e+07	2.78174e+07
PE(40:8)	788.522	3.49314e+06	3.74631e+06	3.05751e+06	4.42609e+06	3.59467e+06	3.99634e+06	3.59172e+06	3.70054e+06	3.5938e+06	2.23541e+06	3.59708e+06	2.89408e+06	3.63683e+06	4.15103e+06	4.20991e+06	3.79073e+06	3.2271e+06	3.08442e+06	4.44506e+06	4.52525e+06	4.77584e+06
PE(41:7)	804.554	211545	142346	233675	498792	371058	387121	438007	308164	355628	203518	211185	232362	476738	568217	495435	307651	317056	352134	730080	591169	593463
PE(42:1)	830.663	552626	350680	402668	468597	425363	510144	377726	497956	407479	286426	246118	339191	121886	228248	182379	566417	445459	638964	586384	710498	648201
PE(42:2)	828.648	1.09784e+06	1.08202e+06	1.10699e+06	1.39598e+06	1.50228e+06	1.55341e+06	934199	987035	919170	795631	823120	880841	524049	557542	655660	1.29459e+06	1.14784e+06	1.09188e+06	1.77783e+06	1.46699e+06	1.53624e+06
PE(42:6)	820.585	2.24001e+06	2.19711e+06	2.64858e+06	2.69527e+06	2.53701e+06	2.90756e+06	2.44356e+06	2.31677e+06	2.31648e+06	1.86977e+06	1.61224e+06	2.56902e+06	2.09207e+06	1.84964e+06	2.21461e+06	2.78286e+06	2.86709e+06	3.11013e+06	3.32704e+06	2.95514e+06	2.68574e+06
PE(42:7)	818.569	1.00091e+06	2.49908e+06	2.80775e+06	3.11002e+06	3.70577e+06	3.21574e+06	3.06149e+06	3.03136e+06	3.14594e+06	2.87785e+06	2.03315e+06	2.74845e+06	3.56768e+06	3.74515e+06	3.38785e+06	2.97828e+06	2.82994e+06	3.02653e+06	4.04162e+06	3.93554e+06	3.42685e+06
PE(44:4)	852.648	208410	245029	291904	346660	409099	358980	215985	241210	248118	183632	212368	209772	173617	152689	194001	404391	417779	445226	414091	508446	480341
PE(44:7)	846.601	554465	533345	496930	575278	658144	694925	451569	460356	419869	422754	524036	475821	576768	485519	526106	406710	465780	343204	547460	610517	579520

[truncated: 1 more sheets: TG]
